# Supplementary material for: A computational model of amoeboid cell motility in the presence of obstacles
Source: Royal Society of Chemistry journal article supplement (doi:10.1039/c8sm00457a), 2018-01-01
Supplement: c8sm00457a2.pdf [file c8sm00457a2.pdf]

## SUPPLEMENTARY MATERIALS

### A computational model of amoeboid cell motility in the presence of obstacles

ERIC J. CAMPBELL AND PROSENJIT BAGCHI<sup>1</sup>

Mechanical and Aerospace Engineering Department  
Rutgers, The State University of New Jersey  
Piscataway, NJ 08854, USA

#### 1. Sensitivity of reaction-diffusion parameters to Turing patterns

R1, #3

Figure S1 shows the phase plots in terms of  $\beta = D_3/D_1$ ,  $s_1$  and  $r_1$  of the RD equations showing different Turing patterns that can be generated on a rigid sphere, and the sensitivity of the parameters. For cell motility simulations, we select parameters giving rise to bifurcating patterns, as these patterns can eventually generate bifurcating pseudopods.

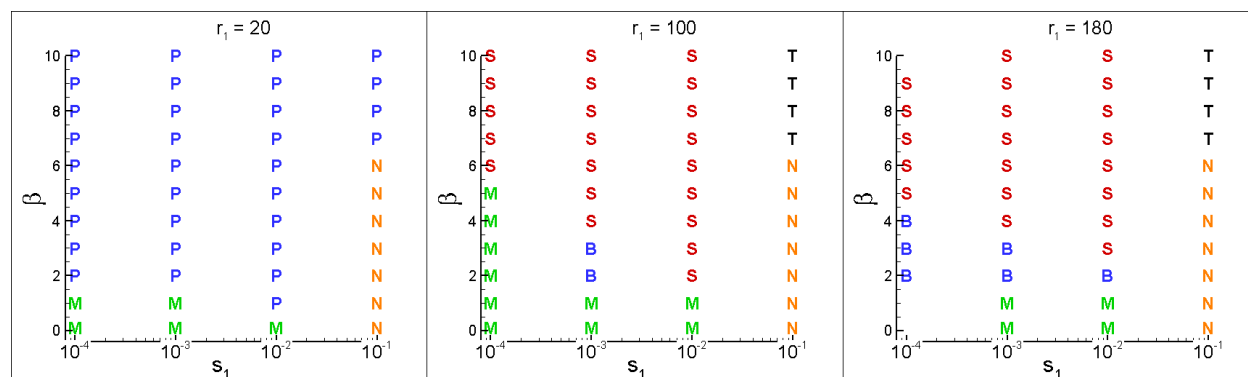

Fig. S1. Turing patterns generated by the RD equations on a rigid sphere: Single, steady patch of activator (P), travelling patch (M), bifurcating patch (B), multiple stable patches (S), stripes (T), and noisy patterns (N). The bifurcating pattern appears over larger space with increasing reaction rate  $r_1$ , since the RD system becomes more unstable.

## 2. Effect of viscoelastic membrane

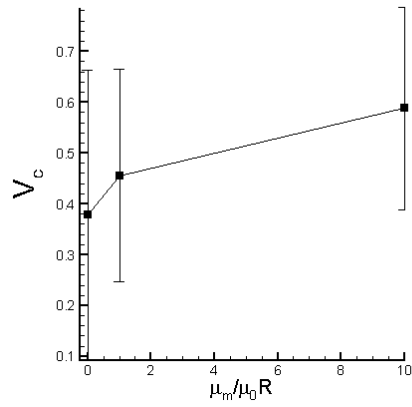

Fig. S2. Influence of membrane viscosity on average cell speed. Variables are defined in main article. Error bars are RMS.

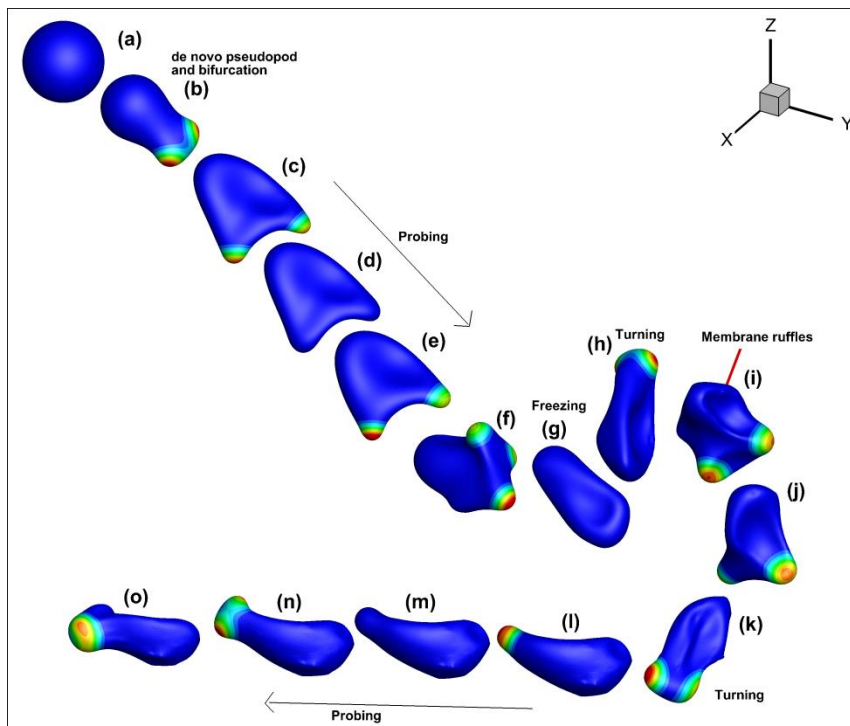

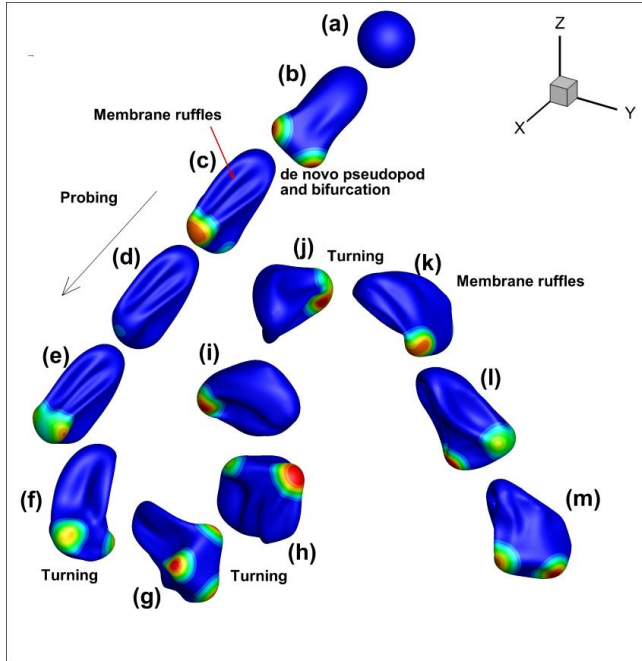

Fig. S3. Effect of viscoelastic membrane on cell motility.  $\mu_m/\mu_0 R = 1$  (top) and 10 (bottom). Similar motile dynamics are observed as for elastic membrane.

### 3. Effect of membrane bending stiffness

R1, #4

Average cell speed and RMS velocity fluctuations are shown in figure S4 for varying dimensionless bending stiffness.

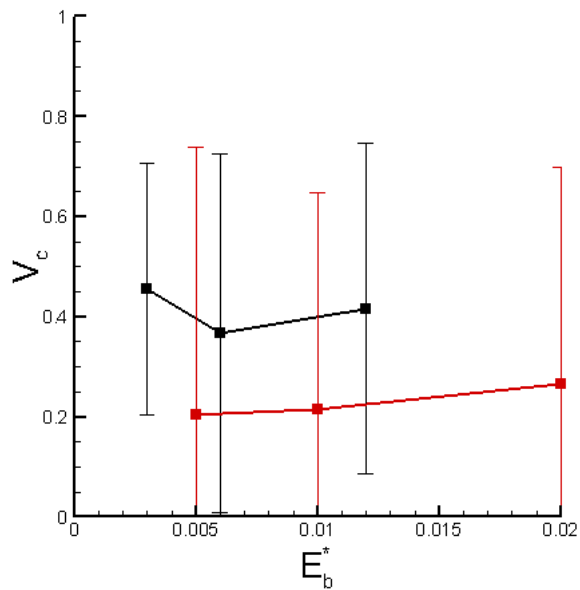

Fig. S4. Average cell speed (black,  $\gamma = 1$ ; red,  $\gamma = 0.5$ ) as a function of dimensionless bending rigidity  $E_B^*$ . Error bars represent RMS velocity fluctuations over time.

#### 4. Preservation of cell volume

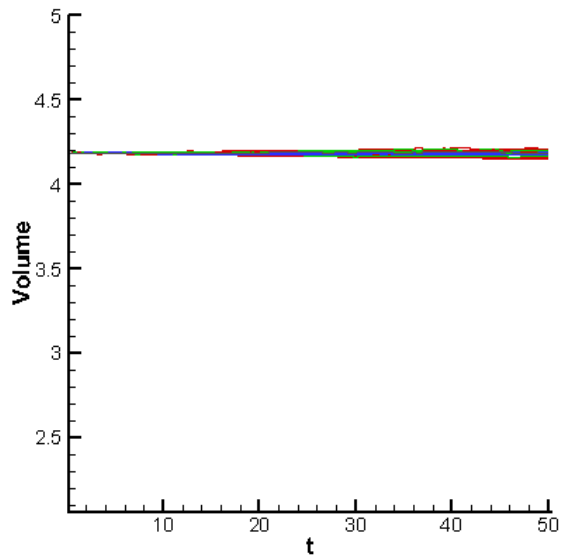

Figure S5. Variation of cell volume (dimensionless) over time for several simulations.
